# Supplementary material for: Efficient synthesis of (R)-harmonine – the toxic principle of the multicolored Asian lady beetle (Harmonia axyridis)
Source: Royal Society of Chemistry journal article supplement (doi:10.1039/c5ob00461f), 2015-01-01

## Supporting Information

### Efficient Synthesis of (*R*)-Harmonine – the toxic principle of the multicolored Asian lady beetle (*Harmonia axyridis*)

Nadja C. Nagel<sup>1</sup>, Anita Masic<sup>2</sup>, Uta Schurig<sup>2</sup>, Wilhelm Boland<sup>1\*</sup>

<sup>1</sup>Max Planck Institute for Chemical Ecology, Beutenberg Campus, Hans-Knoell-Straße 8, D-07745 Jena, Germany

<sup>2</sup>Institute for Molecular Infection Biology, Josef-Schneider-Str. 2/D15, D-97080 Wuerzburg, Germany

\*E-mail: boland@ice.mpg.de

|                                                                      |     |
|----------------------------------------------------------------------|-----|
| <sup>1</sup> H und <sup>13</sup> C NMR spectra .....                 | S2  |
| MS data .....                                                        | S12 |
| Determination of the ee of ( <i>R</i> )- <b>9</b> .....              | S13 |
| Derivatization of ( <i>R</i> )- <b>1</b> with Mosher technique ..... | S14 |
| <sup>19</sup> F NMR spectra .....                                    | S15 |

$^1\text{H}$  NMR spectrum of compound *rac-6* in  $\text{CDCl}_3$  (400 MHz)

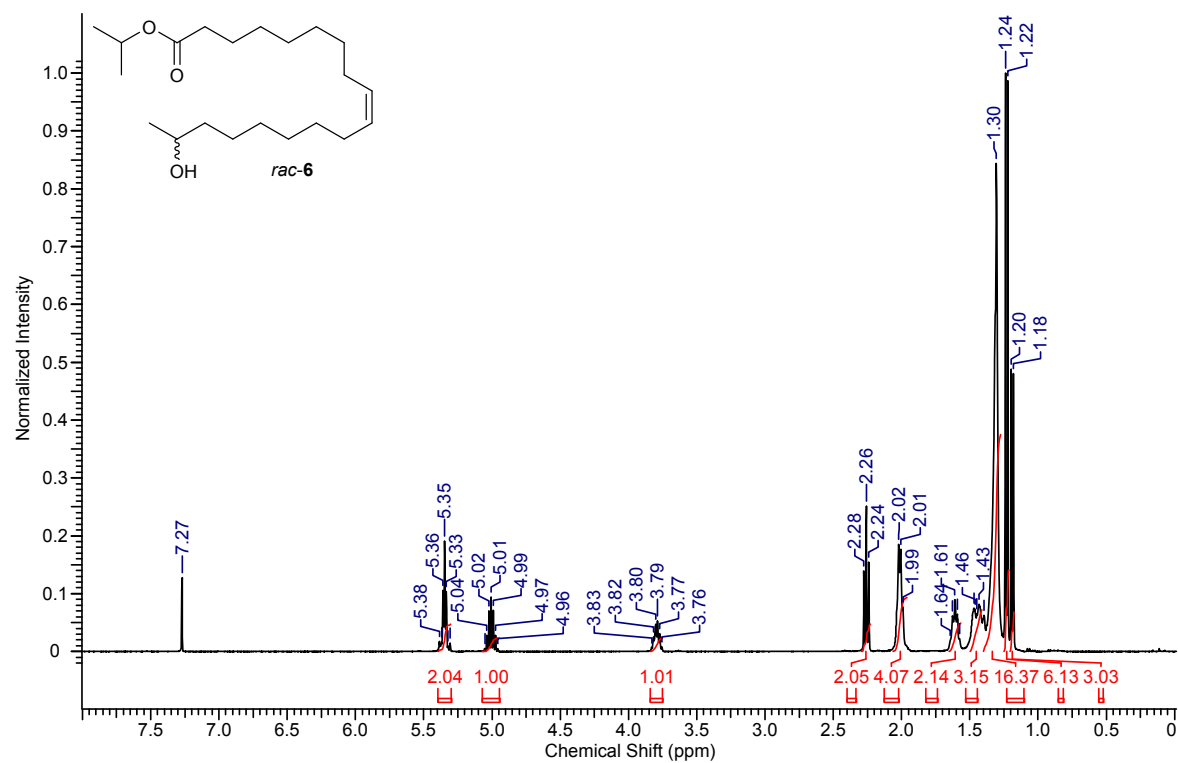

$^{13}\text{C}$  NMR spectrum of compound *rac-6* in  $\text{CDCl}_3$  (100 MHz)

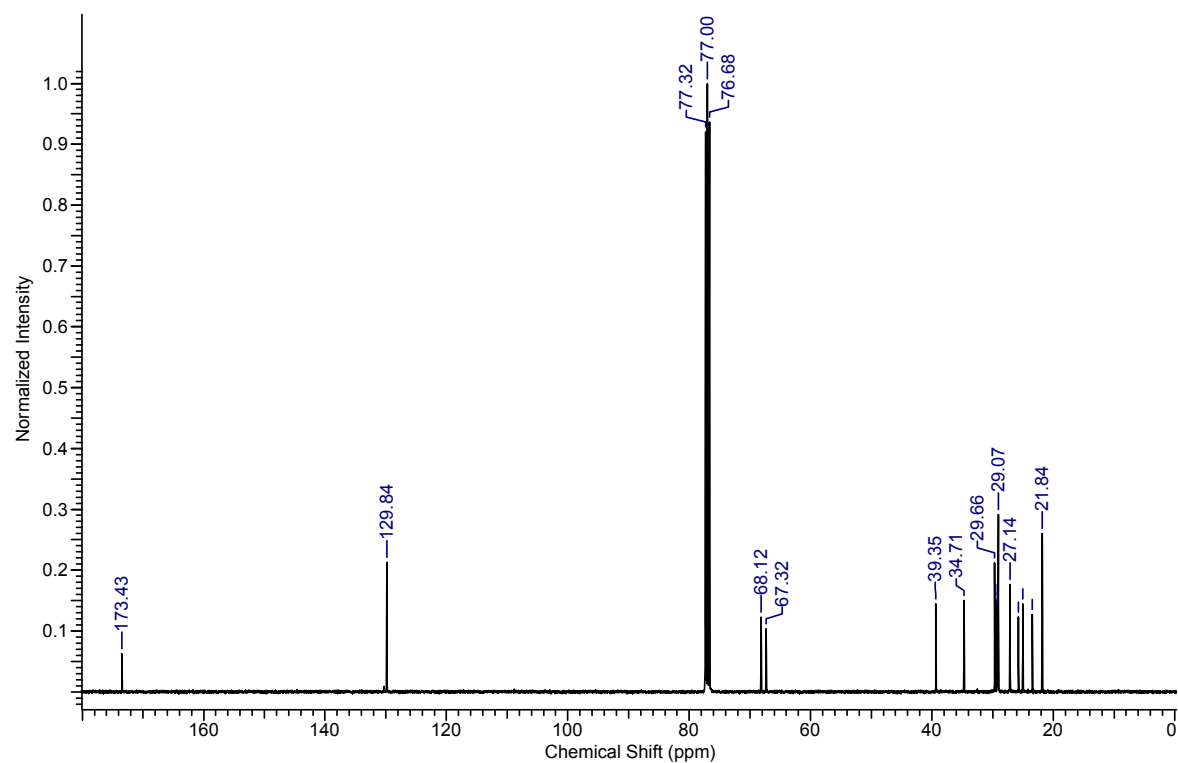

$^1\text{H}$  NMR spectrum of compound (S)-6 in  $\text{CDCl}_3$  (400 MHz)

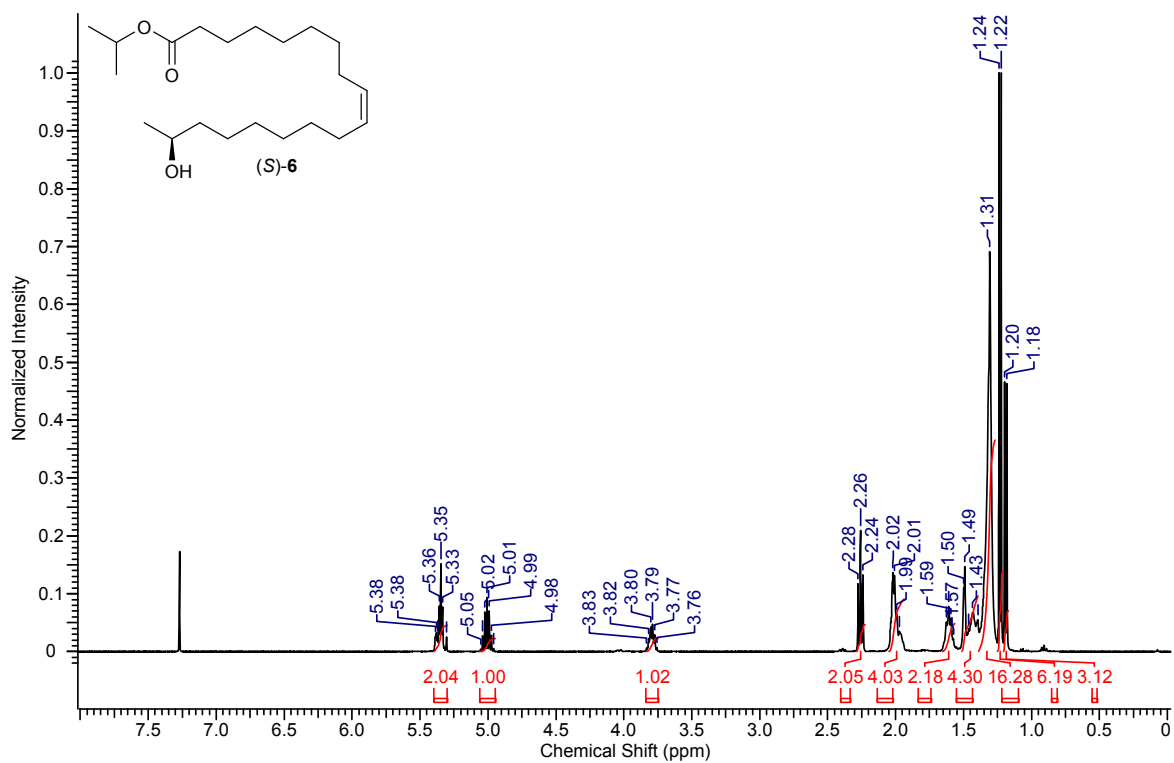

$^1\text{H}$  NMR spectrum of compound *rac*-3 in  $\text{CDCl}_3$  (400 MHz)

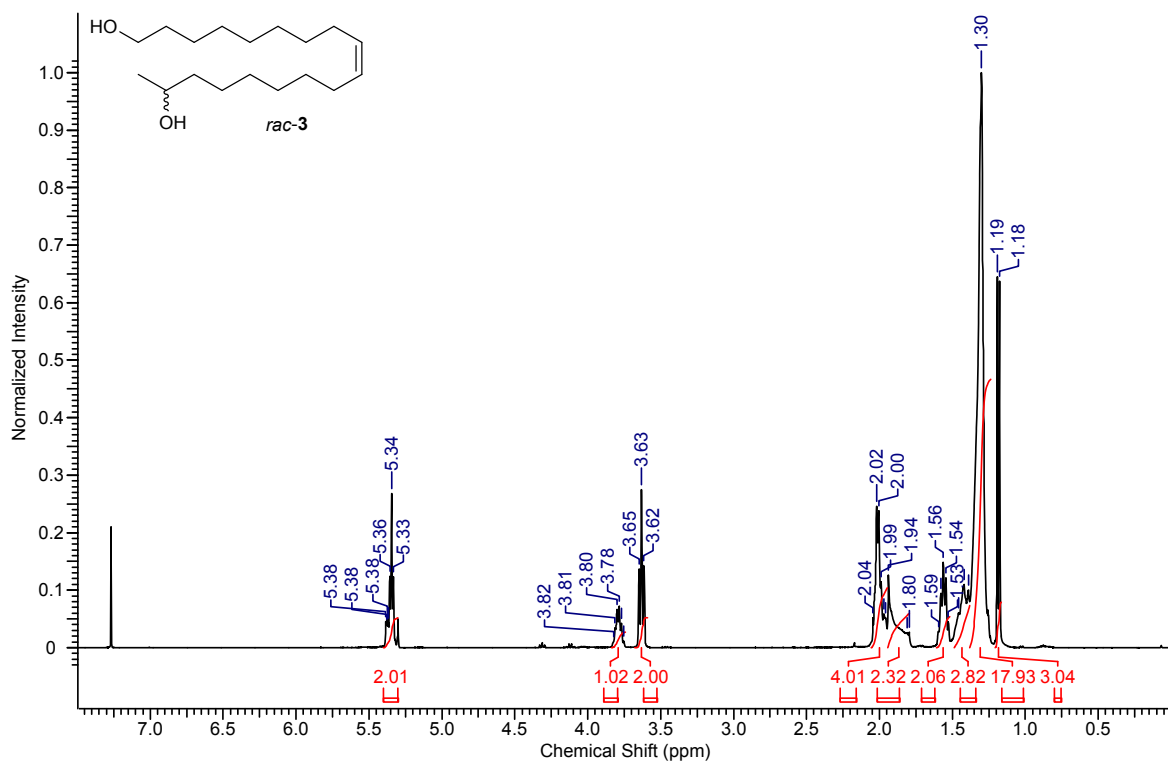

$^1\text{H}$  NMR spectrum of compound (*S*)-**3** in  $\text{CDCl}_3$  (400 MHz)

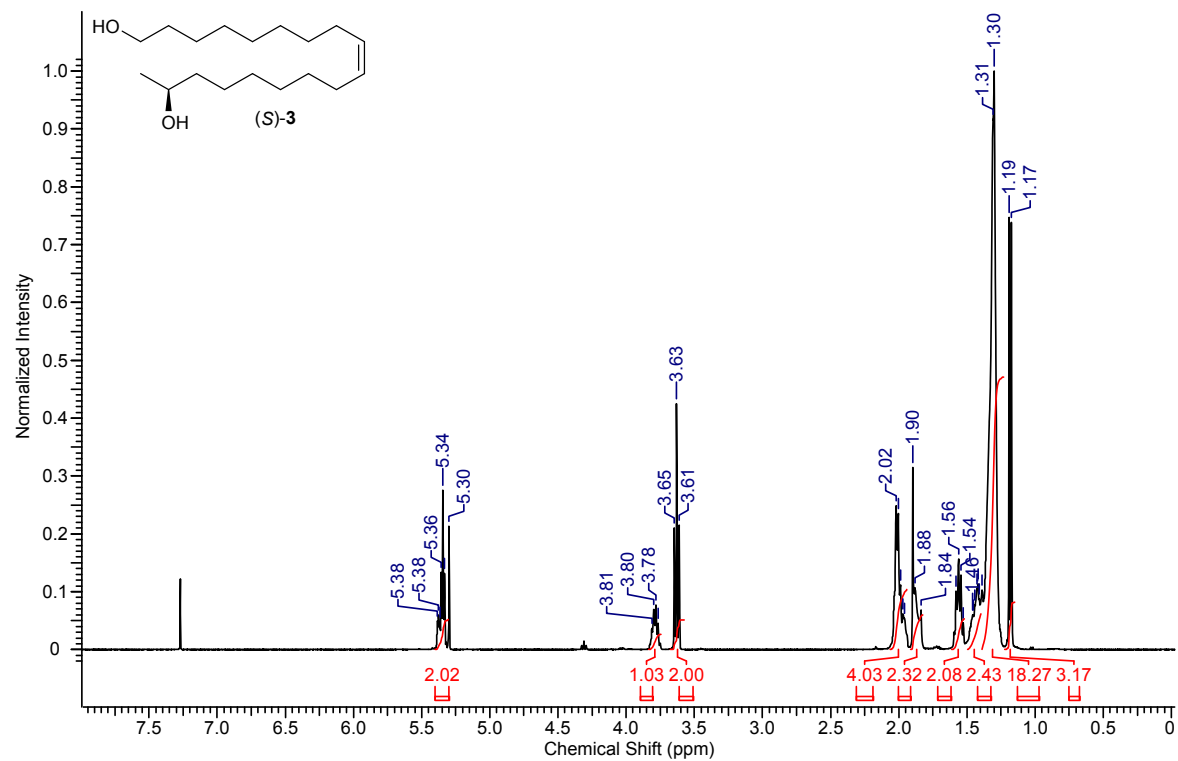

$^1\text{H}$  NMR spectrum of compound *rac*-**7** in  $\text{CDCl}_3$  (400 MHz)

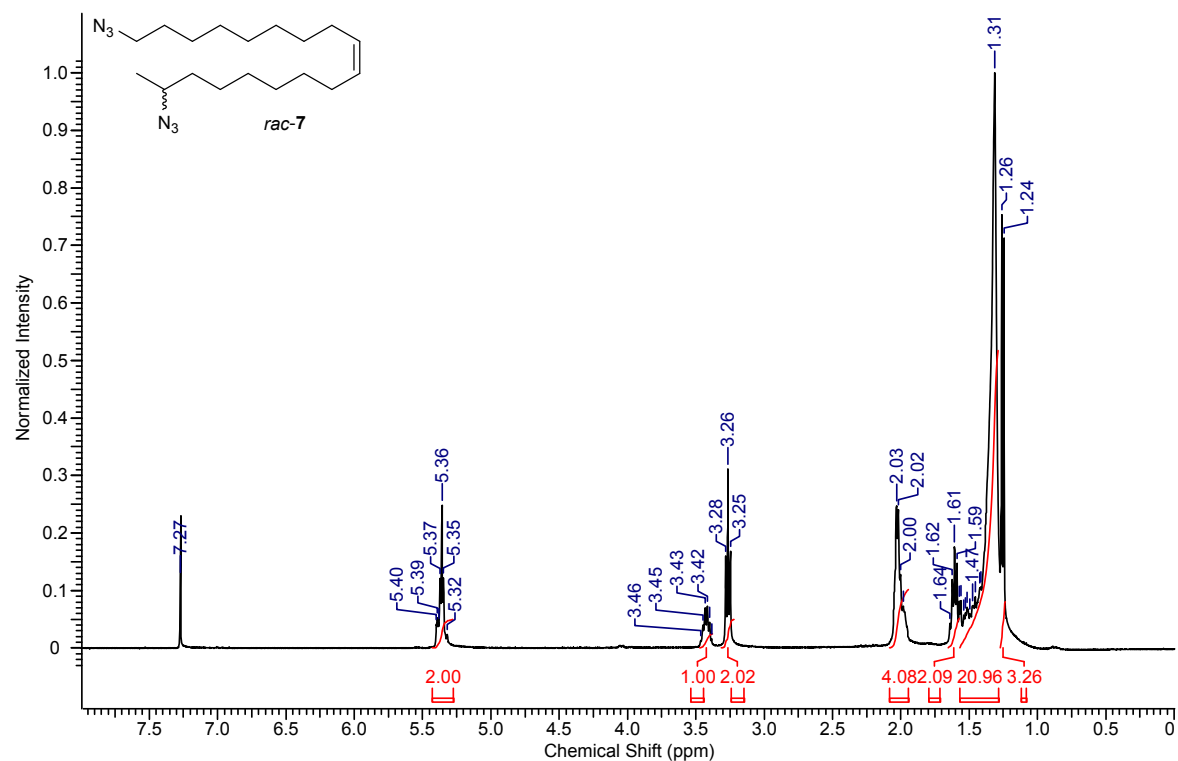

$^1\text{H}$  NMR spectrum of compound (*R*)-7 in  $\text{CDCl}_3$  (400 MHz)

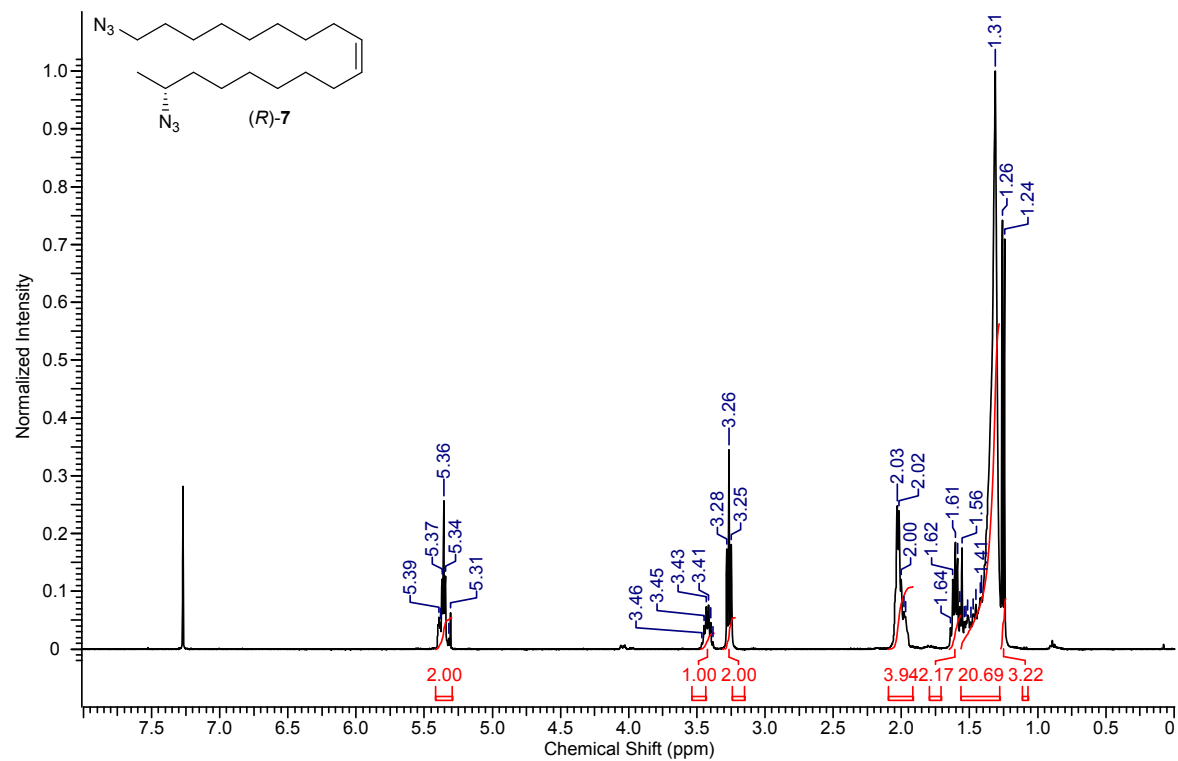

$^1\text{H}$  NMR spectrum of compound *rac*-1 in  $\text{CDCl}_3$  (400 MHz)

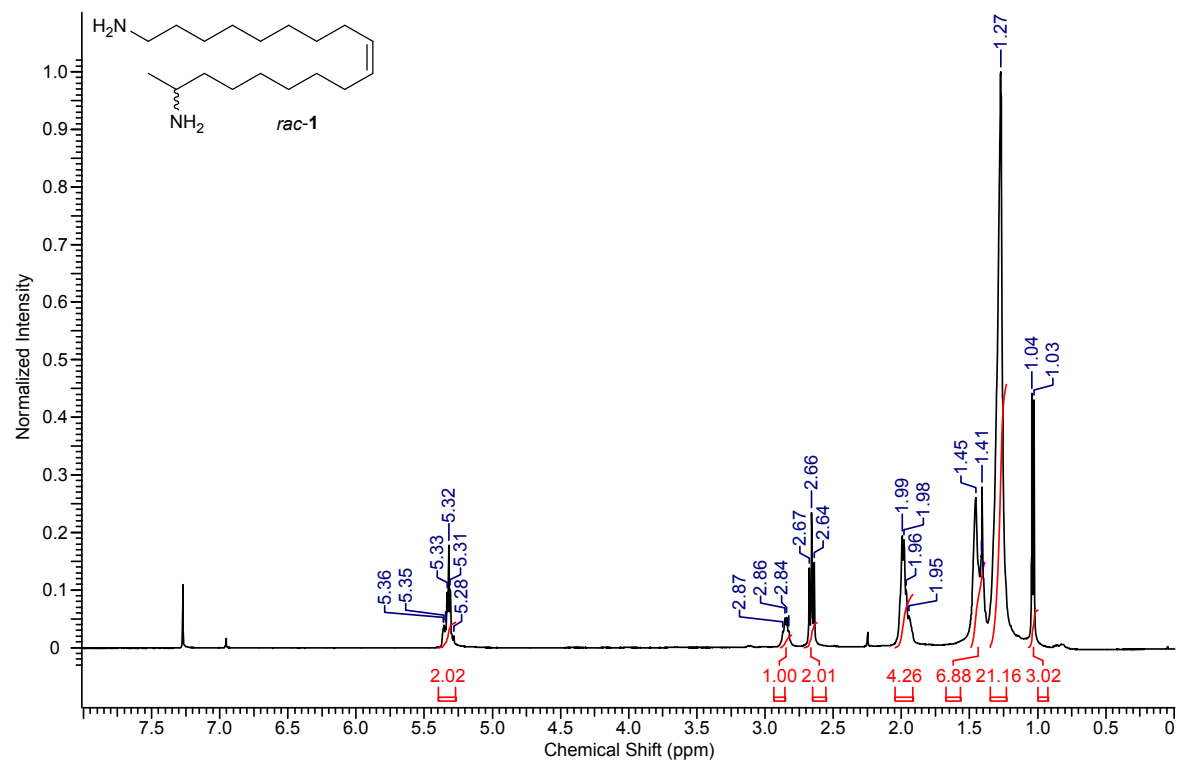

$^1\text{H}$  NMR spectrum of compound (*R*)-**1** in  $\text{CDCl}_3$  (400 MHz)

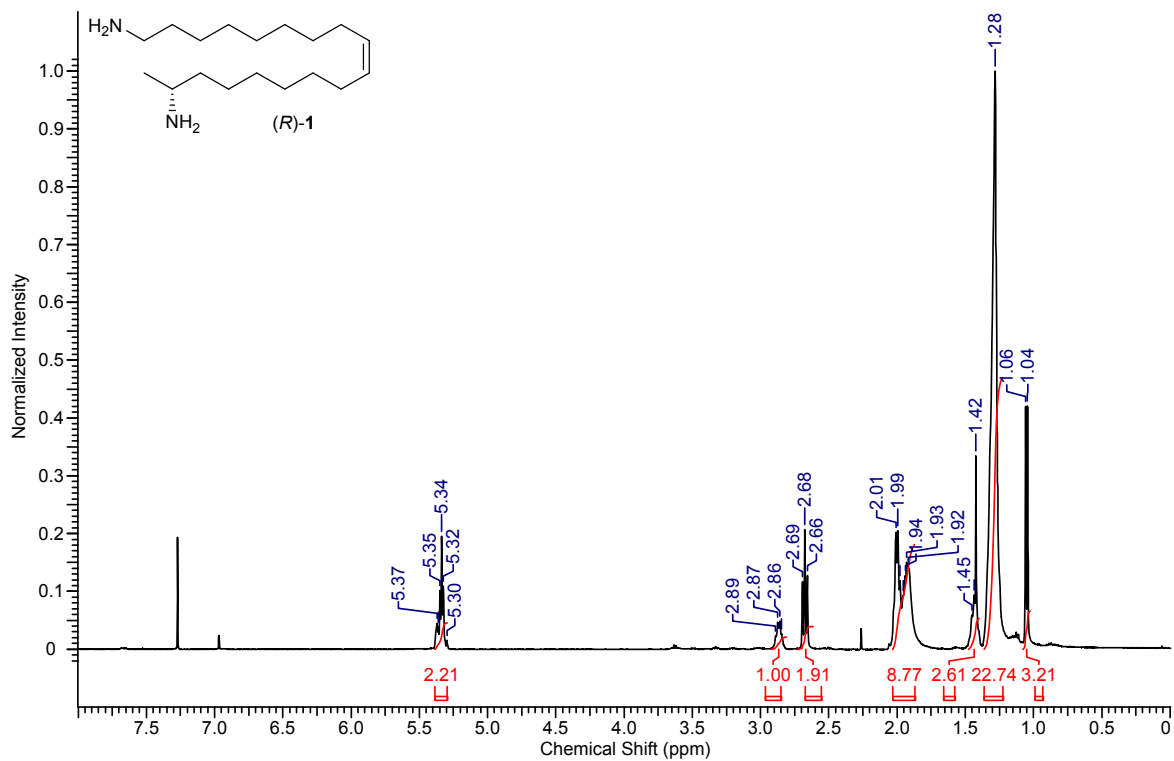

$^1\text{H}$  NMR spectrum of compound *rac-8* in  $\text{CDCl}_3$  (400 MHz)

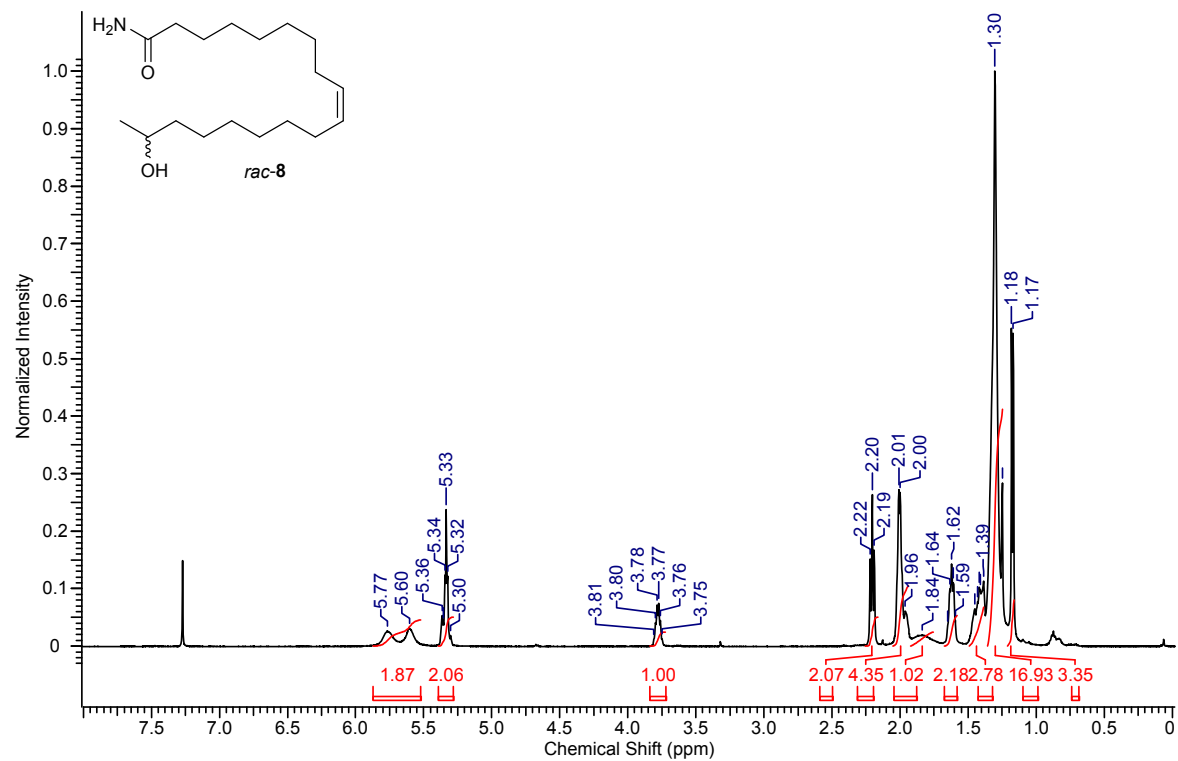

$^{13}\text{C}$  NMR spectrum of compound *rac-8* in  $\text{CDCl}_3$  (100 MHz) (Z/E 80/20)

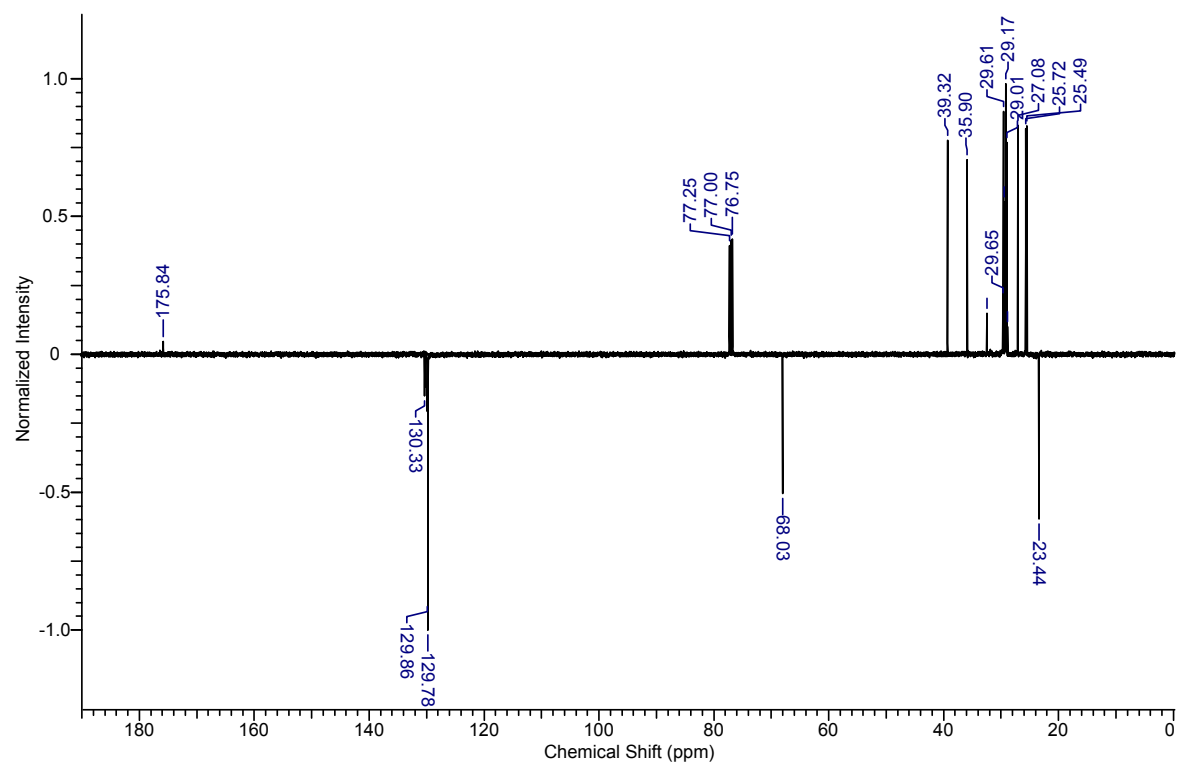

$^1\text{H}$  NMR spectrum of compound *rac-2* in  $\text{CDCl}_3$  (400 MHz)

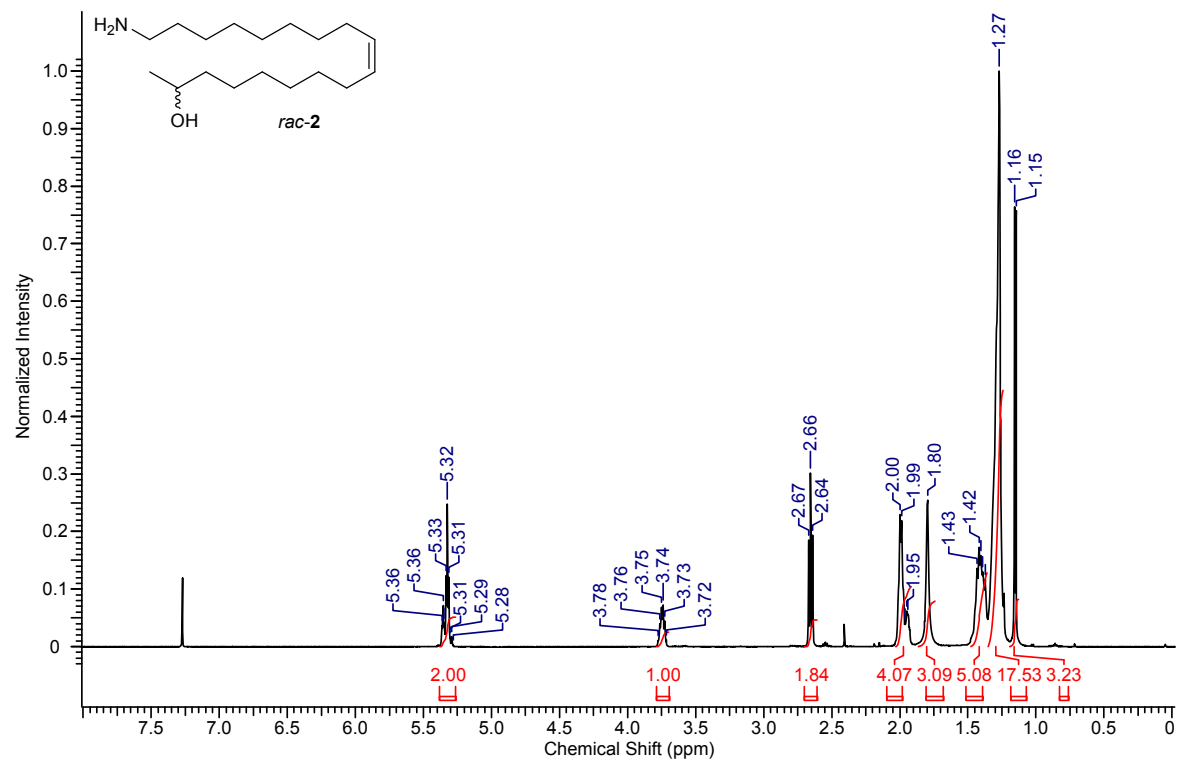

$^{13}\text{C}$  NMR spectrum of compound *rac-2* in  $\text{CDCl}_3$  (100 MHz) (Z/E 80/20)

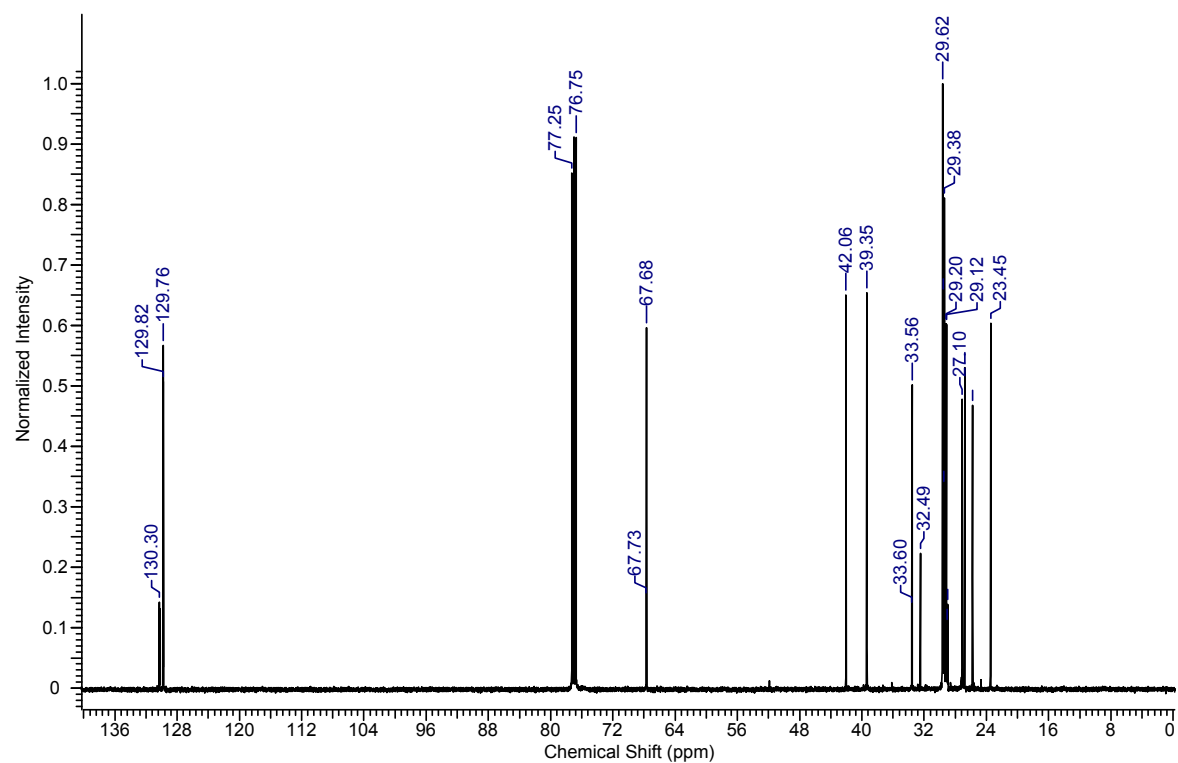



$^1\text{H}$  NMR spectrum of compound (*S*)-**5** in  $\text{CDCl}_3$  (400 MHz) (unpurified)

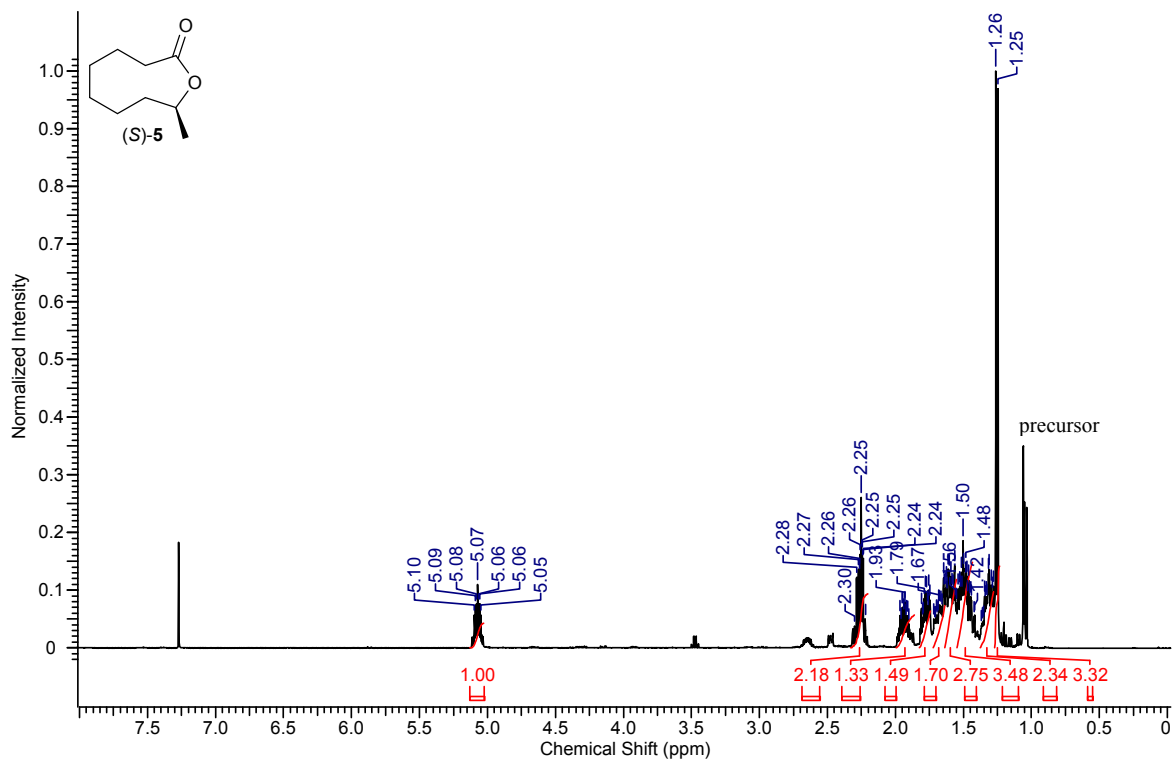

$^1\text{H}$  NMR spectrum of compound (*R*)-**9** in  $\text{CDCl}_3$  (400 MHz) (unpurified)

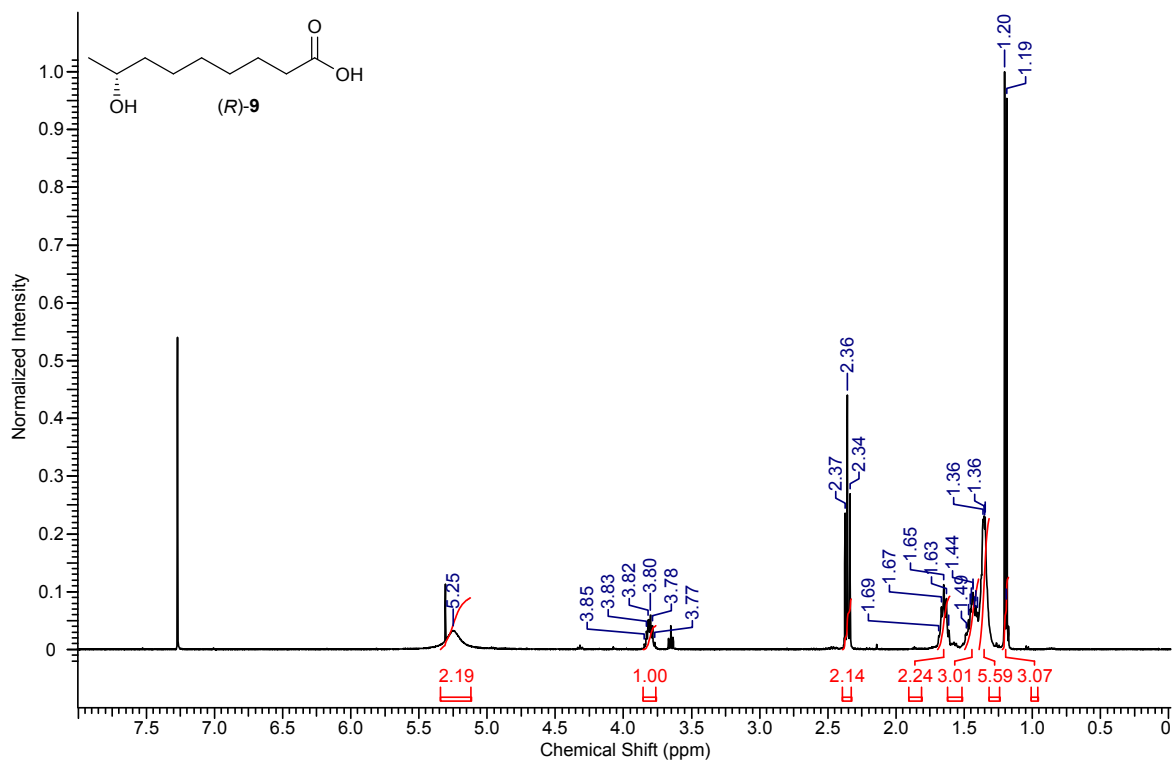

$^1\text{H}$  NMR spectrum of compound **10** in  $\text{CDCl}_3$  (400 MHz)

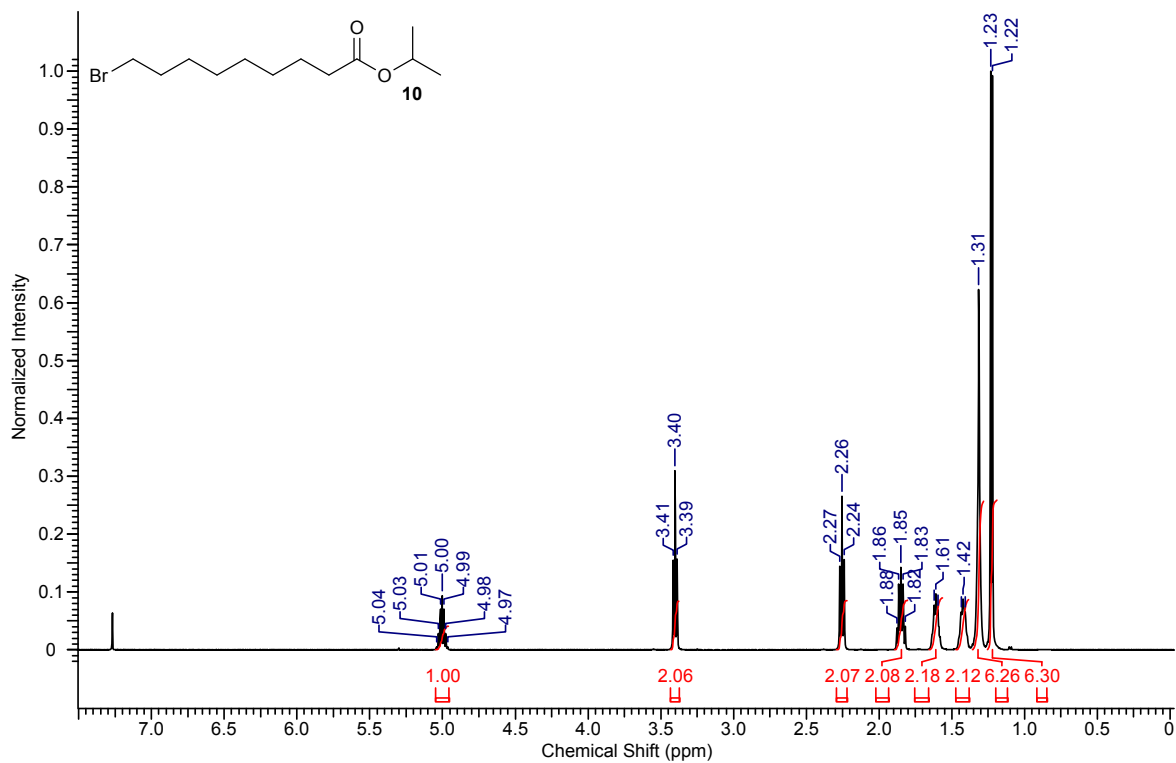

$^{13}\text{C}$  NMR spectrum of compound **10** in  $\text{CDCl}_3$  (100 MHz)

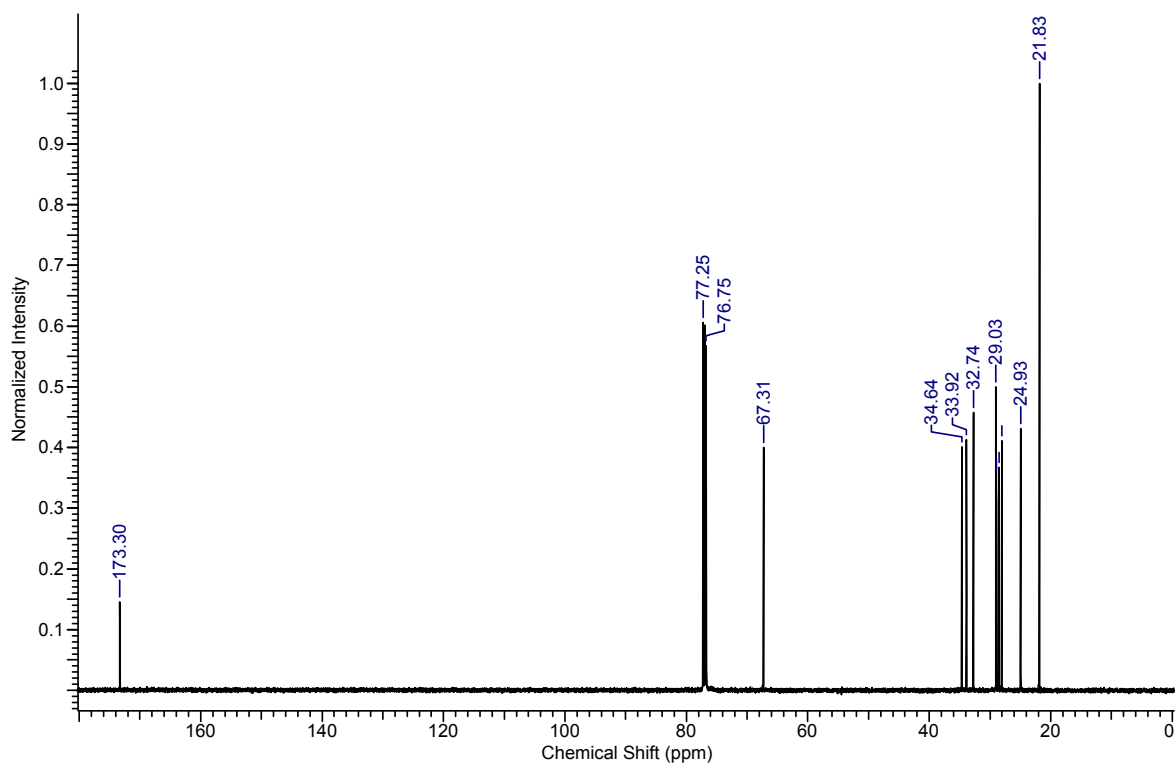

$^1\text{H}$  NMR spectrum of compound **4** in  $\text{CDCl}_3$  (400 MHz)

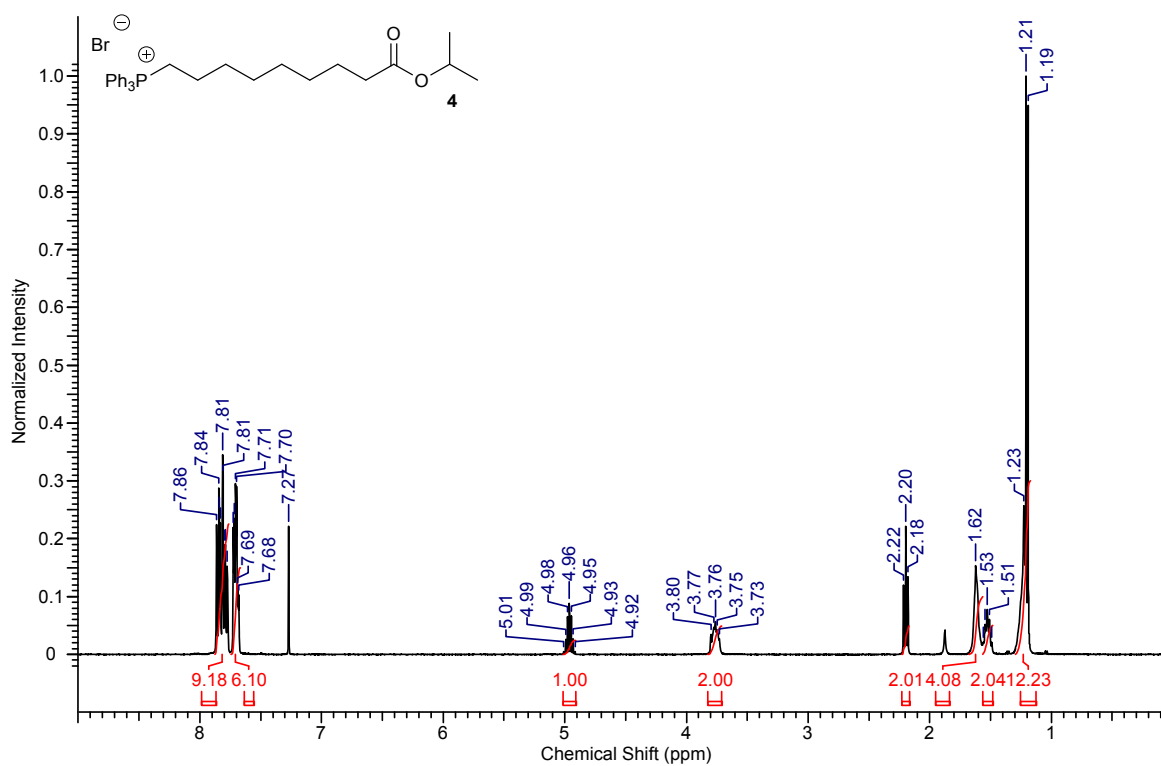

$^{13}\text{C}$  NMR spectrum of compound **4** in  $\text{CDCl}_3$  (100 MHz)

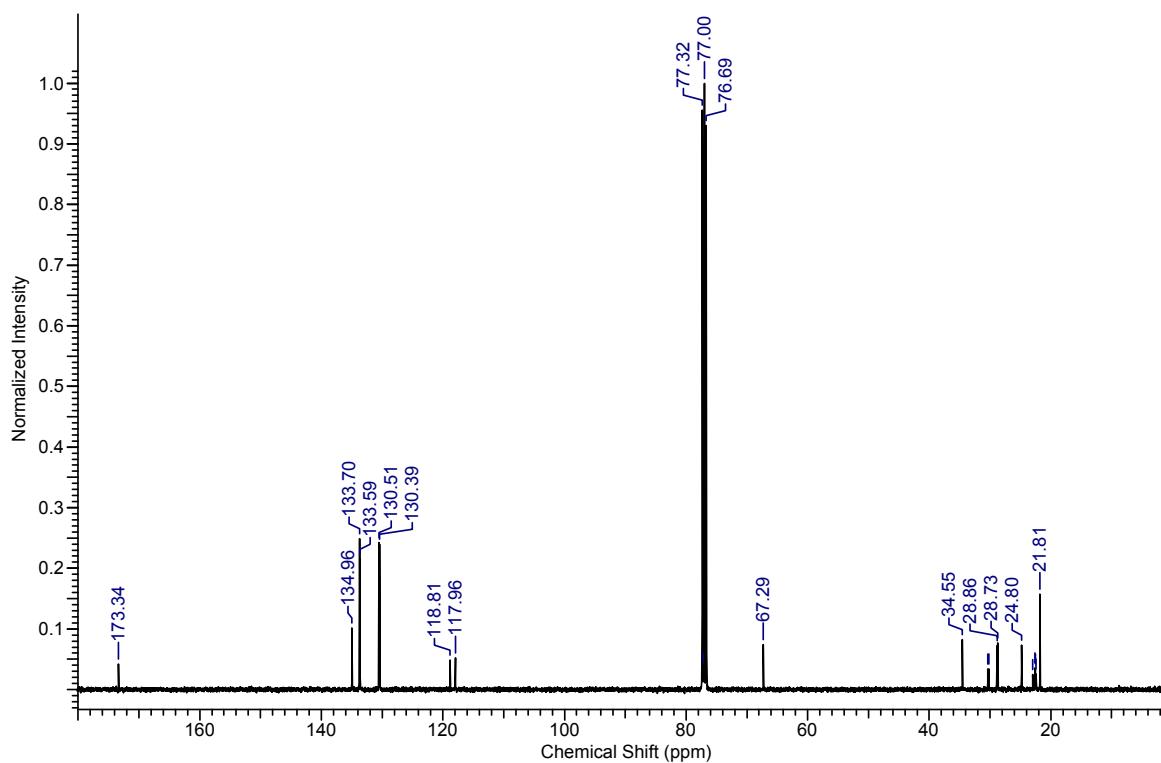

## MS data

**Isopropyl (9Z)-17-hydroxyoctadec-9-enoate (rac-6).** MS (GC-MS, EI) *m/z* (%) 340 ([M]<sup>+</sup>, 0.3), 322 (1.5), 279 (22), 123 (28), 109 (56), 95 (82), 81 (92), 67 (83), 55 (100), 43 (74), 41 (71).

**(9Z)-Octadec-9-ene-1,17-diol (rac-3).** MS (GC-MS, EI) *m/z* (%) 284 ([M]<sup>+</sup>, 0.6), 266 (10), 149 (6), 135 (14), 124 (24), 110 (56), 96 (84), 95 (82), 82 (85), 81 (92), 67 (100), 55 (99).

**(9Z)-Octadec-9-ene-1,17-diamine (rac-1).** MS (HPLC, APCI) *m/z* (%) 283 ([M + H]<sup>+</sup>, 100), 264 (8).

**(9Z)-17-Hydroxyoctadec-9-enamide (rac-8).** MS (GC-MS, EI) *m/z* (%) 297 ([M]<sup>+</sup>, 1), 279 (2), 262 (5), 207 (11), 109 (28), 95 (53), 81 (63), 72 (64), 69 (39), 67 (60), 59 (94), 55 (100), 41 (72).

**(9Z)-18-Aminooctadec-9-en-2-ol (rac-2).** MS (GC-MS, EI) *m/z* (%) 283 ([M]<sup>+</sup>, 18), 268 (38), 250 (12), 238 (22), 222 (12), 210 (14), 196 (16), 182 (35), 168 (48), 154 (96), 140 (38), 123 (18), 109 (36), 95 (86), 81 (90), 79 (46), 67 (100), 55 (42);

**(9S)- 9-Methyl-oxonan-2-one ((S)-5).** MS (GC-MS, EI) *m/z* (%) 156 ([M]<sup>+</sup>, 0.6), 138 (11), 112 (59), 94 (32), 84 (81), 68 (100), 55 (94), 41 (60).

**(8R)-4-Hydroxynonoic acid ((R)-9).** MS (GC-MS, EI) *m/z* (%) 174 ([M]<sup>+</sup>, 0.1), 141 (16), 130 (28), 95 (26), 87 (56), 73 (100), 69 (20), 55 (32), 45 (71).

**Isopropyl 9-Bromononanoate (10).** MS (GC-MS, EI) *m/z* (%) 280, 278 ([M]<sup>+</sup>, 0.04), 265 (0.08), 263 (0.08), 239 (12), 237 (12), 221 (26), 219 (26), 157 (26), 139 (30), 102 (68), 97 (32), 73 (32), 69 (50), 60 (74), 55 (58), 43 (100), 41 (59).

### Determination of the enantiomeric excess of (*R*)-**9**

*Rac*-**9** as well as enzymatically prepared (*R*)-**9** were derivatized with TMS-diazomethane and MSTFA. Separation was achieved on a  $\beta$ -6TBDM column (Figure 1).

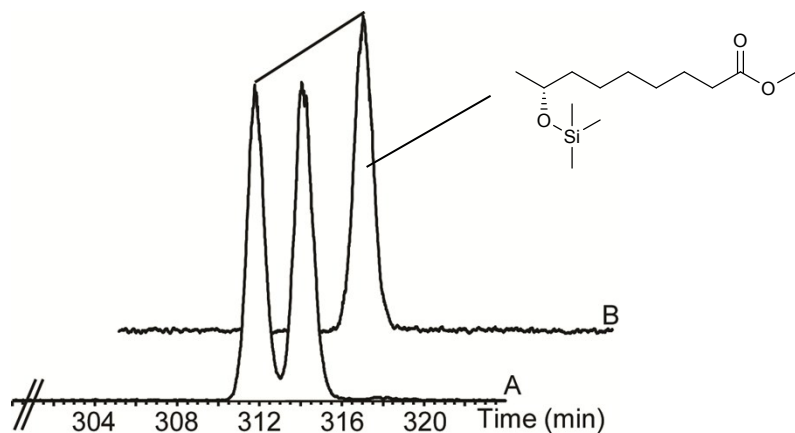

**Figure 1.** GC-MS spectra of A: derivatized racemic mixture *rac*-**9** and B: compound (*R*)-**9**; Determination of the ee of (*R*)-**9**: ee  $\geq$  99 %. GC program: 60 °C (5 min), 0.1 °C/min  $\rightarrow$  120 °C (5 min), 40 °C/min  $\rightarrow$  200 °C (3 min).



$^{19}\text{F}$  NMR spectrum of compound (*R,R*)-**12** in  $\text{CDCl}_3$  (Z/E 80/20)

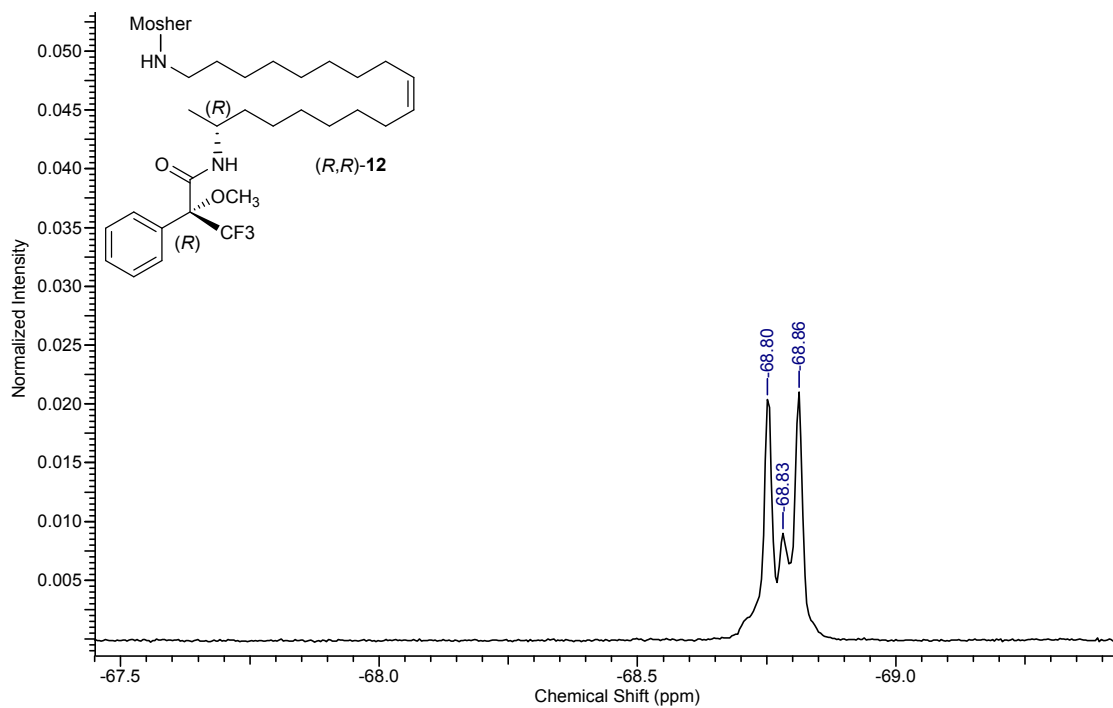

$^{19}\text{F}$  NMR spectrum of compounds (*R,R*)-**12** and (*R,S*)-**12** in  $\text{CDCl}_3$  (Z/E 80/20)

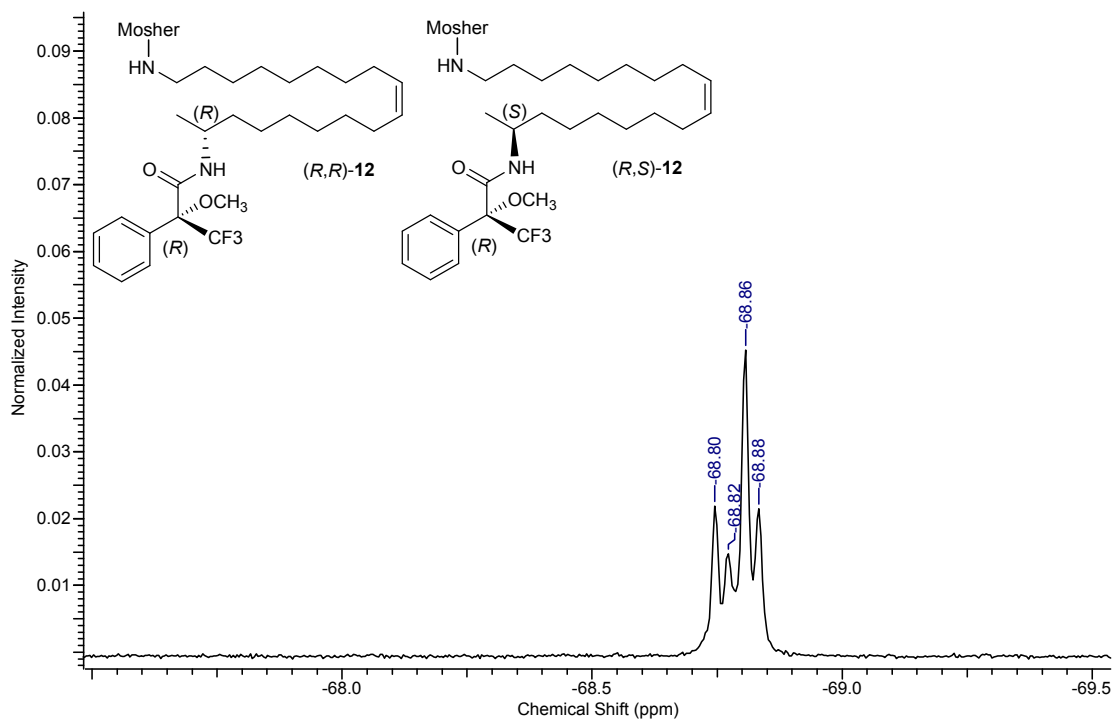

Supplement: c5ob00461f1.pdf [file c5ob00461f1.pdf]
